# Supplementary material for: The long noncoding RNA HOXA11 antisense induces tumor progression and stemness maintenance in cervical cancer
Source: PubMed Central journal article supplement (PMC5347748; doi:10.18632/oncotarget.12863), 2016-10-25
Supplement: oncotarget-07-83001-s001.pdf [file oncotarget-07-83001-s001.pdf]

## The long noncoding RNA *HOXA11 antisense* induces tumor progression and stemness maintenance in cervical cancer

### SUPPLEMENTARY TABLE

Supplementary Table S1: Primer sequences used in this study

| Gene             | Primer sequence        |                       | Product Size (bp) |
|------------------|------------------------|-----------------------|-------------------|
|                  | Forward (5'-3')        | Reverse (5'-3')       |                   |
| HOXA11-AS        | GAGTTTGAAGCCGTGGATGT   | AGATGAGGGGAGAGGTGGAT  | 665               |
| MMP-9            | CGCTACCACCTCGAACTTTG   | GCCATTCACGTCGTCCTTAT  | 196               |
| MMP-2            | GGATGATGCCTTTGCTCG     | ATAGGATGTGCCCTGGAA    | 487               |
| VEGF             | TTGCTGCTCTACCTCCAC     | AAATGCTTTCTCCGCTCT    | 419               |
| E-cadherin       | ATTCTGATTCTGCTGCTCTTG  | AGTAGTCATAGTCCTGGTCCT | 421               |
| $\beta$ -catenin | TGCAGTTCGCCTTCACTATG   | ACTAGTCGTGGAATGGCACC  | 162               |
| N-cadherin       | CCCAAGACAAAGAGACCCAG   | GCCACTGTGCTTACTGAATTG | 140               |
| Vimentin         | TGGATTCACTCCCTCTGGTT   | GGTCATCGTGATGCTGAGAA  | 111               |
| Snail            | GAGGCGGTGGCAGACTAG     | GACACATCGGTCAGACCAG   | 178               |
| Sox-2            | AAGAGAACACCAATCCCATCCA | AGTCCCCCAAAAAGAAGTCCA | 95                |
| Nanog            | GATTTGTGGCCTGAAGAAA    | TTGGGACTGGTGGGAAGAATC | 138               |
| Oct-4            | GCAAAGCAGAAACCCTCGTG   | GAACCACACTCGGACCACAT  | 173               |
